# Supplementary material
Source: PubMed Central journal article supplement (PMC6340762)
Supplement: NIHMS1510015-supplement-1.pdf [file NIHMS1510015-supplement-1.pdf]

Supplementary Table 1: Summary of major clinical therapeutic studies utilizing interferon  $\alpha$ -based therapies.

| Author/Study<br>Number of<br>patients         | Therapeutic<br>Modalities                                                                                                                           | Treatment<br>Duration | Baseline<br>HDV Viral<br>Load             | Biochemical<br>Outcome at<br>EOT                                                                 | Virologic<br>Outcome at<br>EOT                                                                           | Serologic<br>Outcome at EOT                                                                                                     | SVR – 6 months post<br>therapy follow-up                          |
|-----------------------------------------------|-----------------------------------------------------------------------------------------------------------------------------------------------------|-----------------------|-------------------------------------------|--------------------------------------------------------------------------------------------------|----------------------------------------------------------------------------------------------------------|---------------------------------------------------------------------------------------------------------------------------------|-------------------------------------------------------------------|
| Farci P, et<br>al. <sup>99</sup><br>N=42      | IFN $\alpha$ -2a 3 or<br>9 MU TIW vs<br>No Therapy                                                                                                  | 1 year                | NR                                        | ALT<br>Normalization<br>4/14 (29%) –<br>3MU<br>10/14 (71%) –<br>9MU<br>1/13 (8%) –<br>No Therapy | HDV RNA<br>PCR<br>negativity<br>5/14 (36%) –<br>3MU<br>10/14 (71%)<br>– 9MU<br>0/13 (0%) –<br>No Therapy | ALT<br>Normalization +<br>HDV RNA PCR<br>Negativity<br>3/14 (21%) –<br>3MU<br>7/14 (50%) – 9<br>MU<br>0/13 (0%) – No<br>Therapy | 2/14 (14%) – 3MU<br>6/14 (43%) – 9MU<br>1/13 (8%) – No<br>Therapy |
| Castelnau C,<br>et al. <sup>101</sup><br>N=14 | PegIFN $\alpha$ -2b<br>1.5 $\mu$ g/kg/wk                                                                                                            | 1 year                | $9 \times 10^5$<br>copies/ml <sup>^</sup> | 5/14 (36%)<br>ALT<br>normalization                                                               | 8/14 (57%)<br>Undetectable<br>HDV RNA                                                                    | 1/14 (7%) lost<br>HBsAg with<br>seroconversion to<br>anti-HBs                                                                   | 4/14 (29%)<br>Undetectable HDV<br>RNA                             |
| Niro GA, et<br>al. <sup>102</sup><br>N=38     | PegIFN $\alpha$ -2b<br>1.5 $\mu$ g/kg/wk<br>vs PegIFN $\alpha$ -<br>2b 1.5<br>$\mu$ g/kg/wk+RBV<br>x48 wks then<br>PegIFN $\alpha$ -2b<br>for 24wks | 72 weeks              | NR                                        | 6/16 (37.5%)<br>– PegIFN<br>9/22 (41%) –<br>PegIFN + RBV                                         | 3/16 (19%) –<br>PegIFN<br>2/22 (9%) –<br>PegIFN + RBV                                                    | ALT normalization<br>+ HDV RNA PCR<br>negativity in 20%                                                                         | 8/38 (21%)<br>undetectable HDV<br>RNA                             |
| Heller T, et                                  | PegIFN $\alpha$ -2b                                                                                                                                 | Up to 5               | $6.7 \log_{10}$                           | 6/12 (50%)                                                                                       | 4/12 (30%)                                                                                               | 3/12 (25%) with                                                                                                                 | NR                                                                |

|                                                       |                                                   |          |                                                                                                              |                                                                          |                                                                         |                                           |                                                                         |
|-------------------------------------------------------|---------------------------------------------------|----------|--------------------------------------------------------------------------------------------------------------|--------------------------------------------------------------------------|-------------------------------------------------------------------------|-------------------------------------------|-------------------------------------------------------------------------|
| al. <sup>103</sup>                                    | 180 µg/week with increasing doses up to 360 µg/wk | years    | GE/ml*                                                                                                       | ALT normalization during therapy                                         | with HDV RNA negativity                                                 | HDV RNA negativity and HBsAg loss         |                                                                         |
| Kabacam G, et al. <sup>107</sup><br>N=13              | ETV 1mg/d                                         | 1 year   | 4.22 log <sub>10</sub> copies/ml*                                                                            | No change in ALT                                                         | No change in HDV RNA<br><br>Undetected HDV RNA 3/13 (23%) patients      | Increase in HBsAg titers (p=0.03)         | NR                                                                      |
| Lau DT, et al. <sup>108</sup><br>N=5                  | Lam 100mg/d                                       | 1 year   | 5.4 – 8.4 log <sub>10</sub> copies/ml                                                                        | No change in ALT                                                         | No change in HDV RNA                                                    | No change in HBsAg titers                 | N/A                                                                     |
| Yurdaydin C, et al. <sup>109</sup><br>N=39            | IFN 9MU TIW +/- Lam 100mg/d vs Lam 100mg/d        | 1 year   | 5 x 10 <sup>6</sup> copies/ml^                                                                               | 9/14 (64%) IFN + Lam<br>5/8 (63%) IFN<br>3/17 (18%) Lam                  | 7/14 (50%) IFN + Lam<br>4/8 (50%) IFN<br>2/17 (12%) Lam                 | NR                                        | 5/14 (36%) IFN + Lam<br>4/8 (50%) IFN<br>2/17 (12%) Lam                 |
| Wedemeyer H, et al. <sup>110</sup><br>HIDIT-1<br>N=90 | PegIFN α-2a 180 µg ± ADV 10mg/d vs ADV 10 mg/d    | 1 year   | 6.3 log <sub>10</sub> PegIFN + Adefovir^<br>5.9 log <sub>10</sub> PegIFN^<br>5.7 log <sub>10</sub> Adefovir^ | 10/31 (32%) PegIFN + Adefovir<br>8/29 (28%) PegIFN<br>2/30 (7%) Adefovir | 7/31 (23%) PegIFN + Adefovir<br>7/29 (24%) PegIFN<br>0/30 (0%) Adefovir | HBsAg loss<br>2/31 (6%) PegIFN + Adefovir | 8/31 (26%) PegIFN + Adefovir<br>9/29 (31%) PegIFN<br>0/30 (0%) Adefovir |
| Wedemeyer H, et al. <sup>111</sup>                    | PegIFN α-2a ± TDF 300mg/d                         | 92 weeks | NR                                                                                                           | NR                                                                       | 28/59 (48%) PegIFN + TDF                                                | HBsAg loss<br>3/59 (5%) PegIFN            | 17/59 (29%) PegIFN + TDF                                                |

|         |  |  |  |  |                       |                           |                    |
|---------|--|--|--|--|-----------------------|---------------------------|--------------------|
| HIDIT-2 |  |  |  |  | 20/61 (33%)<br>PegIFN | + TDF<br>4/61 (6%) PegIFN | 13/61 (21%) PegIFN |
| N=120   |  |  |  |  |                       |                           |                    |

Symbols: \*, Means; ^, median

Abbreviations: IFN, interferon; MU, million units; TIW, three times per week; NR, not reported; ALT, alanine aminotransferase; HDV, hepatitis D virus; EOT, end of treatment; SVR, sustained virological response; N, number; RNA, ribonucleic acid; PCR, polymerase chain reaction; PegIFN, Peginterferon; µg, microgram; kg, kilogram; wk, week; ml; milliliter; HBsAg, hepatitis B surface antigen; GE, genome equivalents; d, day; ETV, entecavir; LAM, lamivudine; ADV, adefovir; TDF, tenofovir; N/A, not applicable.
